1  
2  
3  
4  
5  
6  
7  
8  
9  
10  
11  
12  
13  
14  
15  
16  
17  
18  
19  
20  
21  
22  
23  
24  
25

**Extensive aquatic subsidies lead to territorial breakdown and high density of an apex predator**

Charlotte E. Eriksson<sup>1</sup>, Daniel L.Z. Kantek<sup>2</sup>, Selma S. Miyazaki<sup>2</sup>, Ronaldo G. Morato<sup>3</sup>, Manoel dos Santos-Filho<sup>4</sup>, Joel S. Ruprecht<sup>1</sup>, Carlos A. Peres<sup>5,6</sup>, Taal Levi<sup>1</sup>

<sup>1</sup>Department of Fisheries and Wildlife, Oregon State University, Corvallis, OR, United States of America

<sup>2</sup>Instituto Chico Mendes de Conservação da Biodiversidade (ICMBIO), Estação Ecológica de Taiamã (EET). Cáceres, MT, Brazil

<sup>3</sup>Instituto Chico Mendes de Conservação da Biodiversidade (ICMBIO), Centro Nacional de Pesquisa e Conservação de Mamíferos Carnívoros (CENAP). Atibaia, SP, Brazil

<sup>4</sup>Departamento de Ciências Biológicas, Universidade do Estado de Mato Grosso (UNEMAT). Cáceres-MT Brazil

<sup>5</sup>Centre for Ecology, Evolution and Conservation, School of Environmental Sciences, University of East Anglia, Norfolk, Norwich, UK

<sup>6</sup> Instituto Juruá, Rua das Papoulas 97, Manaus, Brazil

## 26 **Abstract**

27 Energetic subsidies between terrestrial and aquatic ecosystems can strongly influence food webs  
28 and population dynamics. Our objective was to study how aquatic subsidies affected jaguar  
29 (*Panthera onca*) diet, sociality, and population density in a seasonally flooded protected area in the  
30 Brazilian Pantanal. The diet (n = 138 scats) was dominated by fish (46%) and aquatic reptiles  
31 (55%), representing the first jaguar population known to feed extensively on fish and to minimally  
32 consume mammals (11%). These aquatic subsidies supported the highest jaguar population density  
33 estimate to date (12.4 per 100 km<sup>2</sup>) derived from camera traps (8,065 trap nights) and GPS collars  
34 (n = 13). Contrary to their mostly solitary behavior elsewhere, we documented social interactions  
35 previously unobserved between same-sex adults including cooperative fishing, co-traveling, and  
36 play. Our research demonstrates that aquatic subsidies seen in omnivores can be highly influential  
37 to obligate carnivores leading to high population density and altered social structure.

## 38 **Introduction**

39 Energetic subsidies through the transfer of resources between terrestrial and aquatic ecosystems can  
40 strongly influence food webs and population dynamics (Polis, Anderson and Holt, 1997). The  
41 transfer of energy from large emergences of aquatic insects to terrestrial systems is the canonical  
42 example of this phenomenon (Nakano and Murakami, 2001), but fish-consuming terrestrial  
43 vertebrates can also play an important role. Salmon systems famously support hyperabundant bear  
44 (*Ursus arctos*) populations with modified social dynamics due to the need to tolerate conspecifics at  
45 point sources (e.g., waterfalls and streams) where salmon become accessible (Egbert and Stokes,  
46 1974). Similarly, Rose and Polis (2016) found coastal coyote (*Canis latrans*) populations subsidized  
47 by marine resources to be on average 4-5 times more abundant than inland populations. Several  
48 other omnivorous terrestrial carnivores forage in marine or freshwater systems such as gray wolves

49 (*Canis lupus*), raccoons (*Procyon lotor*) and arctic foxes (*Vulpes lagopus*) (Carlton and Hodder,  
50 2003), but aquatic subsidies in obligate terrestrial carnivores are thought to be rare. Of the obligate  
51 terrestrial carnivores, jaguars (*Panthera onca*) have been most frequently linked to aquatic  
52 resources such as caiman and chelonians (da Silveira *et al.*, 2010), although terrestrial mammals  
53 still dominate their diet.

54 A resource-rich environment may enable multiple individuals to share a common resource,  
55 which typically results in higher animal densities, smaller home-ranges and increased social  
56 interactions among individuals according to the resource dispersion hypothesis (Macdonald, 1983).  
57 Most large felids, including the jaguar, are considered solitary species with social interactions  
58 generally limited to courtship and territorial disputes (Sunquist and Sunquist 2002). However, the  
59 degree of intraspecific tolerance and sociality can change with resource availability (Elbroch &  
60 Quigley, 2017). The Pantanal wetlands in central South America harbors abundant terrestrial and  
61 aquatic jaguar prey resources. Here, jaguars reach high population densities (Soisalo and  
62 Cavalcanti, 2006) and use smaller home-ranges than elsewhere in their range (Morato *et al.*, 2016),  
63 but spatial tolerance of conspecifics, defined by overlapping home-ranges, seem to vary. Azevedo  
64 and Murray (2007) found that jaguars maintained exclusive territories while Cavalcanti and Gese  
65 (2009) found extensive overlap among males but not among females. Consumption of aquatic prey,  
66 mainly caiman (*Caiman yacare*), varies among study areas from 20-30% with terrestrial mammals  
67 still constituting the majority of the diet in all prior research (Fig. 2C). In addition, domestic cattle  
68 are abundant and make up a considerable portion of the jaguar diet in the southern Pantanal where  
69 most research has been conducted to date. Thus, it is currently unclear whether aquatic subsidies  
70 have altered the abundance or social structure of these jaguar populations, as has been demonstrated  
71 with other omnivorous carnivores.

72 In contrast to the southern Pantanal, the ecology of jaguars in the wetter northern portion (i.e.,  
73 within the Brazilian state of Mato Grosso) remains largely unstudied. Taiamã Ecological Station  
74 (hereafter, Taiamã), a small and seasonally flooded protected area (115.55 km<sup>2</sup>), was suggested to  
75 have an unusually high jaguar density based on frequent jaguar sightings (Kantek and Onuma,  
76 2013). A large presence of jaguars in this area is further made obvious by abundant jaguar  
77 footprints, scats, scratch marks on trees and large caiman carcasses scattered along the river  
78 margins. Taiamã (16°50' S and 57°35' W, Fig. 1A) was established in 1981 to protect this unique  
79 wetland ecosystem and its high diversity and abundance of fish species (ICMBIO 2017).  
80 Importantly, there are no human settlements or cattle ranching within or in the immediate vicinities  
81 of Taiamã and fishing is strictly prohibited (ICMBIO 2017). Our objectives were to study the  
82 ecology of jaguars at Taiamã to determine if the presence of abundant aquatic resources affect their  
83 diet, social behavior and ultimately population density, and to place these findings in the context of  
84 previous literature on jaguar ecology. To accomplish these objectives, we collected jaguar scats for  
85 dietary analysis, estimated jaguar density and documented social interactions using camera traps  
86 and telemetry data from 13 jaguars. This research details a rare example of how allochthonous  
87 resource subsidies can be so prolific that they influence the behavior and social organization of an  
88 apex predator.

## 89 **Methods**

90 *Study Area* - The study area encompassed Taiamã Island and Sararé Island bounded by the  
91 Paraguay and Bracinho rivers within the Brazilian Pantanal (Fig. 1A). The area is characterized by  
92 permanent lakes and seasonally flooded grasslands and riparian gallery forests. The climate is  
93 defined by a dry (April-September) and wet season (October-March) with an average annual  
94 precipitation of 1,200-1,300 mm. The maximum river level occurs between February-June and the

95 lowest in August-November. The fluctuating water levels substantially alter the availability of  
96 terrestrial vs aquatic habitats (Fig. 1A) and determine local ecological patterns and processes,  
97 including the distribution and abundance of wildlife (Mamede and Alho, 2006).

98 *Camera dataset* - We carried out three camera trapping surveys between 2014 and 2018. The  
99 absence of roads or trails coupled with the prolonged flood pulse and the high jaguar density  
100 presented unique logistical challenges for field work and prevented any movement by car or foot.  
101 All camera deployments were therefore boat-based and restricted to the major waterways and, thus,  
102 prevented the use of a systematic camera grid. We used unbaited Bushnell (Trophy Cam 119636)  
103 and Browning (Dark Ops BTC-6) camera traps separated by approximately 2 km along the  
104 Paraguay and Bracinho rivers. The two waterways were parallel to each other and separated by 4-6  
105 km (Fig. 1A). Camera availability varied across the years. In 2014 and 2015 39 and 27 single  
106 cameras were set to video mode (20 sec/video) and operated for 56 (August-October) and 252 days  
107 (March-November), respectively. In 2018 one camera was set to video and the other paired camera  
108 was set to take photos (three per burst) for 65 days (August-October) at 20 camera stations.  
109 Cameras were set approximately 50 cm off the ground on trees and checked every three weeks. The  
110 study area encompassed an area of approximately 236.7 km<sup>2</sup>, which is larger than a jaguar home  
111 range in this area (Morato et al., 2016) as recommended for accurate density estimation (Tobler and  
112 Powell, 2013). Individual jaguars were identified in each photo or video based on their unique coat  
113 patterns. The camera detections were collapsed into weekly occasions for density estimation. The  
114 252-day long camera deployment in 2015 was split into two sessions to assume demographic  
115 closure resulting in four sessions of 8, 18, 18 and 10 weekly occasions each. Camera trap sampling  
116 details are summarized in Appendix S1: Table S1.

117 *Telemetry dataset* - Seven male and six female jaguars were captured between December 2011 and  
118 April 2016 as part of concurrent studies (Morato *et al.*, 2016) (SISBIO #30896-3). Jaguars were  
119 captured using foot snares and immobilized with tiletamine and zolazepam (10 mg/kg). Two of the  
120 jaguars were fitted with VHF radio-collars and the remaining (n = 11) were fitted with Lotek-  
121 Iridium GPS collars programmed to record location data every hour and to automatically drop-off  
122 the animal after 400 days.

123 *Density estimation* - A fundamental issue with density estimation is how to deal with lack of  
124 geographic closure given that some fraction of detected individuals primarily lives outside the study  
125 area. Spatially explicit Capture-Recapture models (SCR; Borchers and Efford 2008; Royle and  
126 Young 2008) have become a preferred method for density estimation over conventional non-spatial  
127 capture-recapture techniques that are sensitive to the arbitrarily defined effective sampling area.  
128 While SCR models present a useful advance over conventional capture-recapture models, they  
129 assume isotropic (i.e., circular) home ranges such that the detection probability of each individual  
130 falls off equally with distance from its activity center. Our telemetry data revealed that the direction  
131 of jaguar movement at Taiamã follows the rivers closely and the home ranges are therefore  
132 elongated and highly anisotropic (Fig. 1B and C). SCR models may still perform well if sufficient  
133 detectors are placed in two dimensions capturing both the major axis of movement (along the rivers  
134 in our case) and the minor axis (perpendicular to the rivers) (Efford, 2019). The bias can also be  
135 corrected by applying anisotropic detection models if all individual home ranges are directionally  
136 aligned (Murphy *et al.*, 2016). Since our camera deployment was boat-based and restricted to the  
137 rivers, we were unable to effectively capture jaguar movement in the minor axis, and telemetered  
138 jaguars did not consistently share the same home range orientation (Fig. 1B, C). Applying a SCR  
139 model to this unusual dataset where the detectors are aligned with elongated home ranges would

140 therefore lead to an overestimation of the spatial scale parameter and consequently underestimate  
141 density (Efford, 2019).

142 For data-rich applications where a representative portion of the population has been telemetered,  
143 the extent of geographic closure violations can be corrected for directly (Ivan, White and Shenk,  
144 2013) to estimate population density without the restrictive assumptions of circular home ranges or  
145 the size of the effective sampling area. This method uses a conventional Huggins closed-capture  
146 model augmented by telemetry data to estimate the proportion of time telemetered individuals spend  
147 within the sampling area (i.e., residency) to directly correct for closure violations. We used this  
148 method with the modification of allowing capture probability to vary by sex and included a random  
149 effect on residency by individual jaguar so that one individual's data would not dominate the  
150 estimate (full methods and JAGS code in Appendix S2).

151 *Diet analysis* - Jaguar scats were collected opportunistically during field work. Undigested remains  
152 found in the scats were isolated by rinsing in a fine mesh, dried, and identified to the lowest taxon  
153 possible using a dissecting scope. We compared our frequency of occurrence diet estimates to other  
154 published work that used either scat or kill site analysis. For comparative purposes, we grouped  
155 prey items into 'mammals', 'reptiles', 'fish' and 'birds' and standardized frequency of occurrence  
156 values to sum to 100%.

157 *Social interactions among jaguars* - We investigated shared space use among the resident jaguars  
158 collared in 2014-2015 (n=9), by quantifying the proportion of overlap at the 95% individual  
159 utilization distribution using the Autocorrelated Kernel Density Estimator (AKDE) in the R package  
160 'CTMM' (Calabrese, Fleming and Gurarie, 2016). Because jaguars exhibiting home-range overlap  
161 can still be avoiding each other temporally, we analyzed the frequency of social interactions by  
162 assessing simultaneous locations from both GPS data and camera data. GPS interaction rates were

163 calculated using the package wildlifeDI (Long and Nelson, 2013) in R and defined as the number of  
164 times two GPS-collared jaguars were within 200 m of each other (Cavalcanti and Gese, 2009;  
165 Elbroch and Quigley, 2017). We defined camera interaction rates as the number of times two  
166 jaguars were observed together or within 30 min of each other. We collapsed interactions between  
167 individuals per day such that multiple contacts within the same day were not counted as new  
168 interactions for both the GPS and camera data.

## 169 **Results**

170 We operated 59 camera stations for 8,065 days between 2014 and 2018 (Appendix S1: Table S1;  
171 Fig. 1A). Jaguars were detected at 95% of the cameras ( $n = 56$ ) and were the most frequently  
172 detected mammal (Fig. 1D). We obtained 1,594 videos of jaguars (excluding the photos from the  
173 paired cameras in 2018), representing 385 individual weekly detections with the number of  
174 detections per individual ranging from one to 34 (mean  $5.6 \pm 5.9$  SD). We detected 12 out of the 13  
175 telemetered jaguars with our camera traps. We detected an additional 29 females, 21 males, two  
176 individuals of unknown sex, and four cubs, representing a total of 69 unique individuals. The  
177 maximum number of unique jaguars captured by one camera was 15 across all 3 years including 9  
178 just in 2015. Both right and left flanks were obtained for most of the individuals using both our  
179 video setup in 2014 and 2015 and paired camera setup in 2018. One jaguar was captured only on  
180 her left side but was included in the dataset since the closest female with only a right-side capture  
181 was detected 20 km away and had a distinct rosette pattern. We were therefore able to retain all  
182 identified jaguars in the analyses. The highest minimum number of jaguars known to be present  
183 within the study area within one camera session was 40 (Appendix S1: Table S1).

184 The telemetered jaguars spent on average 96% of the time within the study area (Fig. 1B, C)  
185 Estimated jaguar density was 12.4 per 100 km<sup>2</sup> and mean capture probability per weekly occasion



186 was 0.18 (0.15 - 0.21 Bayesian Credible Interval; BCI) for females and 0.27 (0.24 - 0.31 BCI) for  
187 males. Density was similar across the three dry season sessions at 12.3 (10.1 - 14.4), 11.9 (10.1 -  
188 12.9) and 11.3 (9.4 - 13.1) jaguars per 100 km<sup>2</sup>, in session 1, 3, and 4, respectively. The wet season  
189 estimate from session 2 was 14.3 (12.2 - 15.4) jaguars per 100 km<sup>2</sup> (Appendix S1: Table S2), even  
190 though some 40% of the Taiamã land area becomes seasonally flooded.

191 *Jaguar diet* - We identified nine prey items in 138 jaguar scats collected from 2013-2018. The  
192 jaguar diet was dominated by three taxonomic groups: reptiles (55%), fish (46%) and mammals  
193 (11%) (Fig. 2A). These findings were corroborated by camera data showing jaguars feeding on fish  
194 and caimans, and other field observations such as large caiman skulls and fish carcasses scattered  
195 along the rivers. Fish remains found in the scats could not be identified to species, however, the  
196 camera data revealed jaguars capturing thorny catfish (*Doradidae*) (Fig. 2D), pacu (*Piaractus*  
197 *mesopotamicus*), red-bellied piranha (*Pygocentrus nattereri*), and large tiger catfish  
198 (*Pseudoplatystoma fasciatum*) (Fig. 2D; see Appendix S2: Fig.S1 for jaguar fishing behavior). Most  
199 mammals consumed were semi-aquatic capybaras (*Hydrochoerus hydrochaeris*). Rare prey items  
200 included green iguana (*Iguana iguana*), Brazilian porcupine (*Coendou prehensilis*), freshwater crab,  
201 and gray four-eyed opossum (*Philander opossum*) (Fig. 2B).

202 *Social interactions* - All resident GPS-collared males had overlapping 95% AKDE home ranges,  
203 except for M3 and M4 (Appendix S2: Fig.S2A). M1 overlapped from 17.6 to 25.5% with M2 and  
204 M3, respectively, while M2 and M3's home ranges overlapped by 64.7%. M5 overlapped with M1  
205 by 7.6% and 16.1% with M3. The 95% AKDE home range also overlapped extensively between  
206 GPS-collared females (Appendix S2: Fig.S2B). F2's home range overlapped by 58.6% with F1 and  
207 the home ranges of F3 and F4 overlapped to 21.6%. F1 and F2 were unrelated while F3 and F4 were  
208 mother and daughter (Kantek et al., 2021). Including jaguars detected only by camera, between 4-15

209 individuals were detected within the home ranges of telemetered jaguars indicating even higher  
210 spatial tolerance than observed with GPS data alone.

211 We documented 80 independent social interactions between adult jaguars based on the camera  
212 (n=40) and GPS data (n=40). The majority of the interactions were between males and females (M-  
213 F 85%), and involved 29 individual jaguars (14 males and 15 females). We documented 12  
214 interactions of the same sex (one F-F and 11 M-M) consisting of 10 individuals (two females and  
215 eight males). Two GPS-collared males, M2 and M1, moved continuously within approximately 41-  
216 182 m of each other for two days. Eight months later they were captured with the same camera 5  
217 min apart. M2 moved continuously with another GPS-collared male (M3) for 10 hours within 4-38  
218 m of each other, again two days later (2 hours; 14 m apart) and were close again two weeks later (1  
219 hour; 159 m). None of the three males were related (Kantek et al., 2021). Two other males (M7 and  
220 M21) were seen fishing together (Fig. 3D) and walking past another camera together on two  
221 separate occasions. Two males (M29 and M27) spent 30 min in front of a camera “playing” (Fig. 3E  
222 and F). Two females (F2 and F4) were documented in the same location 12 min apart (Fig. 3G). We  
223 lack information on potential relatedness among the interacting uncollared jaguars.

## 224 **Discussion**

225 We have reported on an extraordinarily high density for a large-bodied apex predator that is  
226 extensively sustained by aquatic subsidies. Jaguars in Taiamã have by far the most aquatic diet and  
227 the least mammal consumption of any previously studied population. Although jaguars in Taiamã  
228 consume more aquatic reptiles than has ever been observed, it is fish consumption that makes this  
229 population truly unique (Fig. 2C). As far as we know, this is the most piscivorous diet of any large  
230 felid and among the most for any terrestrial hypercarnivore. Even the famous tigers (*Panthera*  
231 *tigris*) in the Sundarbans mangroves of India still consume mostly terrestrial mammals (Aziz, Islam  
232 and Groombridge, 2020). The small fishing cat (*Prionailurus viverrinus*) may be the most similar

233 example of a piscivorous felid akin to the jaguars at Taiamã (Ganguly and Adhya, 2020). Although  
234 jaguars are commonly associated with rivers (Morato *et al.*, 2018) and local knowledge indicates  
235 that jaguars prey on fish, the only published records of fish consumption include anecdotal  
236 observations of jaguars fishing summarized in Gudger (1946) and more recently Emmons (1987)  
237 found fish in two jaguar scats. However, localized fish consumption may be more common than is  
238 currently appreciated. We are aware of one unpublished study from a coastal island in Northern  
239 Brazil that also indicates substantial reliance on fish (Vergara, 2011). Given limited previous  
240 research in this remote roadless region, it is possible that what we have discovered at Taiamã is  
241 broadly representative of jaguar foraging ecology within this highly flooded portion of the Pantanal.

242 These extensive aquatic subsidies support perhaps the highest density jaguar populations  
243 described to date (12.4 jaguars per 100 km<sup>2</sup>). Even just the 13 *telemetered* individuals that we knew  
244 were all present in 2015 with on average 96% of GPS locations contained within the study area  
245 (236.7 km<sup>2</sup>) would suggest a density of approximately 5.4 per 100 km<sup>2</sup> without considering the  
246 additional 56 individuals detected with cameras. Just this density estimate from telemetered  
247 individuals is comparable or exceeds other high jaguar density estimates such as 4.5 jaguars/100  
248 km<sup>2</sup> from the Peruvian Amazon (Tobler *et al.*, 2018), 4.4 jaguars/100 km<sup>2</sup> in the Venezuelan Llanos  
249 (Jędrzejewski *et al.*, 2017), and 6.6 to 6.7 jaguars/100 km<sup>2</sup> in the southern Pantanal (Soisalo and  
250 Cavalcanti, 2006).

251 According to the resource dispersion hypothesis, abundant resources can lead to a breakdown in  
252 territoriality and increased social tolerance among individuals (Macdonald, 1983). Aquatic  
253 subsidies are uniquely capable of providing the requisite levels of resource abundance because their  
254 ability to rapidly generate energetically inexpensive heterotherms in productive aquatic habitats.  
255 The association of aquatic subsidies with high population density and increased social tolerance of

256 jaguars at Taiamã is similar to that observed with brown bears in systems with high salmon  
257 abundance. Evidence of high social tolerance at Taiamã includes highly overlapping home ranges,  
258 substantial time spent co-traveling, and numerous social interactions directly observed by video  
259 monitoring (Fig. 5). The most notable social interactions include social play and cooperative fishing  
260 behavior. The social play among adult animals observed here is rarely documented and is thought to  
261 occur when all biological needs have been met (Bekoff, 1972). The incident of play between M27  
262 and M29 started with passive submissive patterns such as rolling over, facial rub, and face-paws  
263 (Fig. 5E, F). The play then transitioned to play-fighting with wrestling, soft bites, and mounting.  
264 Cooperative fishing occurred among a female and her older cub as well as two adult males that were  
265 also observed co-traveling on three occasions (Fig.5D; Appendix S2: Fig.S1). We cannot determine  
266 whether this form of cooperative fishing improved fish capture efficiency, or whether co-fishing  
267 jaguars simply tolerated the close proximity of each other without deriving any additional prey-  
268 acquisition benefits.

269 Our study demonstrates that aquatic subsidies, frequently described in omnivores, can be  
270 influential to the ecology and behavior of obligate carnivores as well. This work further sheds new  
271 light on the relationship between carnivore socioecology and prey abundance, showing that the  
272 modal pattern of solitary behavior observed in the majority of hyper-carnivores can be broken given  
273 the nature, productivity, and distribution of the resource base. Further research is needed to  
274 understand the role jaguars play in linking aquatic and terrestrial food webs. Potential implications  
275 of this highly-subsidized population for terrestrial prey are highly divergent including either the  
276 suppression of terrestrial prey via apparent competition (Holt, 1977) or release from predation  
277 pressure through aquatic diet specialization (i.e. apparent mutualism; (Holt and Bonsall, 2017)).  
278 Finally, this research demonstrates the flexibility and context-dependence of animal ecology and  
279 behavior such that even well-studied charismatic vertebrates continue to surprise us.

## 280 **Acknowledgments**

281 This study was funded by Helge Ax:son Johnson Foundation and Oregon State University. We  
282 thank ICMBio and UNEMAT for facilitating this research. We thank Manaav Kamath, Aurea  
283 Ignácio, Claumir Muniz, Amabile Furlan and Derrick Campos for logistical support and field work  
284 assistance, as well as Gerlane Costa for help with prey remain identification.

## 285 **Literature cited**

- 286 Alho, C. (2008) ‘Biodiversity of the Pantanal: response to seasonal flooding regime and to  
287 environmental degradation’, *Brazilian Journal of Biology*, 68(4), 957–966.
- 288 Azevedo, F. C. and Murray, D. L. (2007) ‘Spatial organization and food habits of jaguars (*Panthera*  
289 *onca*) in a floodplain forest’, *Biological Conservation*, 137(3), pp. 391–402.
- 290 Aziz, M. A., Islam, M. A. and Groombridge, J. (2020) ‘Spatial differences in prey preference by  
291 tigers across the Bangladesh Sundarbans reveal a need for customised strategies to protect prey  
292 populations’, *Endangered Species Research*. Inter-Research Science Center, 43, pp. 65–74.
- 293 Bekoff, M. (1972) ‘The development of social interaction, play, and metacommunication in  
294 mammals: An ethological perspective’, *The Quarterly Review of Biology*, 47(4), pp. 412–434.
- 295 Borchers, D. and Efford, M. (2008) ‘Spatially explicit maximum likelihood methods for capture–  
296 recapture studies’, *Biometrics*, (64), pp. 377–385.
- 297 Calabrese, J. M., Fleming, C. H. and Gurarie, E. (2016) ‘ctmm: an R package for analyzing animal  
298 relocation data as a continuous-time stochastic process’, *Methods in Ecology and Evolution*, 7, pp.  
299 1124–1132.
- 300 Carlton, J. T. and Hodder, J. (2003) ‘Maritime mammals: terrestrial mammals as consumers in

- 301 marine intertidal communities’, *Marine Ecology Progress Series*, 256, pp. 271–286.
- 302 Cavalcanti, S. M. and Gese, E. M. (2009) ‘Spatial ecology and social interactions of jaguars  
303 (*Panthera onca*) in the southern Pantanal, Brazil’, *Journal of Mammalogy*, 90(4), pp. 935–945.
- 304 Efford, M. (2019) ‘Non-circular home ranges and the estimation of population density’, *Ecology*,  
305 100(2), p. e02580.
- 306 Egbert, A. and Stokes, A. (1974) ‘The social behaviour of brown bears on an Alaskan salmon  
307 stream’, *Biology and Management*, 3, pp. 40–56.
- 308 Elbroch, L. M. and Quigley, H. (2017) ‘Social interactions in a solitary carnivore’, *Current*  
309 *Zoology*, 63(4), pp. 357–362.
- 310 Emmons, L. H. (1987) ‘Comparative feeding ecology of felids in a neotropical rainforest’,  
311 *Behavioral Ecology and Sociobiology*, 20(4), pp. 271–283.
- 312 Ganguly, D. and Adhya, T. (2020) ‘How fishing cats *Prionailurus viverrinus* fish: Describing a  
313 felid’s strategy to hunt aquatic prey’, *bioRxiv*, [Preprint].
- 314 Gudger, E. W. (1946) ‘Does the jaguar use his tail as a lure in fishing’, *Journal of Mammalogy*,  
315 27(1), pp. 37–49.
- 316 Holt, R. D. (1977) ‘Predation, apparent competition, and the structure of prey communities’,  
317 *Theoretical Population Biology*, 12, pp. 197–229.
- 318 Holt, R. D. and Bonsall, M. B. (2017) ‘Apparent competition’, *Annual Review of Ecology and*  
319 *Systematics*, 48, pp. 447–71.
- 320 ICMBIO (2017) ‘Plano de Manejo da Estação Ecológica de Taiamã’, Instituto Chico Mendes de  
321 Conservação da Biodiversidade, Brasília, Brasil.

- 322 Ivan, J. S., White, G. C. and Shenk, T. M. (2013) ‘Using auxiliary telemetry information to estimate  
323 animal density from capture-recapture data’, *Ecology*, 94(4), pp. 809–816.
- 324 Jędrzejewski, W. *et al.* (2017) ‘Density and population structure of the jaguar (*Panthera onca*) in a  
325 protected area of Los Llanos, Venezuela, from 1 year of camera trap monitoring’, *Mammal  
326 Research*, 62, pp. 9–19.
- 327 Kantek, D. L. Z. and Onuma, S. S. M. (2013) ‘Jaguar conservation in the region of Taiama  
328 Ecological Station, Northern Pantanal, Brazil.’, *Publication UEPG. Ciências Biológicas e da Saude*,  
329 19, pp. 69–74.
- 330 Kantek, D. Z. *et al.* (2021) ‘Jaguars from the Brazilian Pantanal: low genetic structure, male-biased  
331 dispersal, and implications for long-term conservation’, *Biological Conservation*, In press.
- 332 Long, J. A. and Nelson, T. A. (2013) ‘Measuring dynamic interaction in movement data’,  
333 *Transactions in GIS*, 17(1), pp. 62–77.
- 334 Macdonald, D. W. (1983) ‘The ecology of carnivore social behaviour’, *Nature*, 301, pp. 379–383.
- 335 Morato, R. *et al.* (2018) ‘Resource selection in an apex predator and variation in response to local  
336 landscape characteristics’, *Biological Conservation*, 228, pp. 233–240.
- 337 Morato, R. G. *et al.* (2016) ‘Space use and movement of a neotropical top predator: the endangered  
338 jaguar’, *Plos One*, 11(12), p. e0168176.
- 339 Murphy, S. M. *et al.* (2016) ‘Characterizing recolonization by a reintroduced bear population using  
340 genetic spatial capture–recapture’, *Journal of Wildlife Management*, 80(8), pp. 1390–1407.
- 341 Nakano, S. and Murakami, M. (2001) ‘Reciprocal subsidies: Dynamic interdependence between  
342 terrestrial and aquatic food webs’, *PNAS*, 98(1), pp. 166–170.

- 343 Polis, G. A., Anderson, W. B. and Holt, R. D. (1997) 'Toward an integration of landscape and food  
344 web ecology: The dynamics of spatially subsidized food webs', *Annual Review of Ecology and*  
345 *Systematics*, 28, pp. 289–316.
- 346 Rose, M. D. and Polis, G. A. (1998) 'The distribution and abundance of coyotes: The effects of  
347 allochthonous food subsidies from the sea', *Ecology*, 79(3), pp. 998–1007.
- 348 Royle, J. A. and Young, K. V (2008) 'A hierarchical model for spatial capture-recapture data',  
349 *Ecology*, 89(8), pp. 2281–2289.
- 350 da Silveira, R. *et al.* (2010) 'Depredation by jaguars on caimans and importance of reptiles in the  
351 diet of jaguar', *Journal of Herpetology*, 44(3), pp. 418–424.
- 352 Soisalo, M. K. and Cavalcanti, S. M. C. (2006) 'Estimating the density of a jaguar population in the  
353 Brazilian Pantanal using camera-traps and capture-recapture sampling in combination with GPS  
354 radio-telemetry', *Biological Conservation*, 129(4), pp. 487–496.
- 355 Sunquist, M. and Sunquist, F. (2002) *Wild cats of the world*. University of Chicago Press.
- 356 Tobler, M. W. *et al.* (2018) 'Do responsibly managed logging concessions adequately protect  
357 jaguars and other large and medium-sized mammals? Two case studies from Guatemala and Peru',  
358 *Biological Conservation*, 220, pp. 245–253.
- 359 Tobler, M. W. and Powell, G. V. N. (2013) 'Estimating jaguar densities with camera traps:  
360 Problems with current designs and recommendations for future studies', *Biological Conservation*,  
361 159, pp. 109–118.
- 362 Vergara, M (2011) 'Aspectos ecológicos da onça-pintada (*Panthera onca*) em uma ilha costeira na  
363 região norte do Brasil', dissertation, Universidade Federal de Santa Maria, Brazil.



## 364 **Figure Legends**

365 Figure 1. (A) Map of study area at Taiamã Ecological Station within the Pantanal wetlands in Mato  
366 Grosso, Brazil. (B) GPS locations of six resident males and one transient. (C) GPS locations of five  
367 resident females and one transient. (D) Number of detections of medium and large mammal species  
368 at Taiamã Ecological Station using camera traps from 2014-2018.

369 Figure 2. Frequency of occurrence of prey found in jaguar scats (n = 138) in Taiamã Ecological  
370 Station between 2013 and 2018. (A) Main food groups: reptiles, fish, and mammals. (B) All  
371 identified prey items. (C) Frequency of occurrence of vertebrate prey groups found in diets  
372 throughout the geographic range of jaguars. Only peer-reviewed studies with a sample size of at  
373 least 20 scats or kill sites were included (See Appendix S4: Table S1 for more information). (D) F8  
374 carrying a tiger catfish (*Pseudoplatystoma fasciatum*) and M4 after catching a thorny catfish  
375 (*Doradidae* spp.).

376 Figure 3. (A) Number and type of social interactions among adult jaguars determined by GPS data  
377 and camera trap data. (B-C) Male and female mating behavior, (D) Two adult males fishing together,  
378 (E-F) two adult males playing, (G) Two females captured with the same camera 12 minutes apart.

379

380

381

382

383

384

385 Figure 1

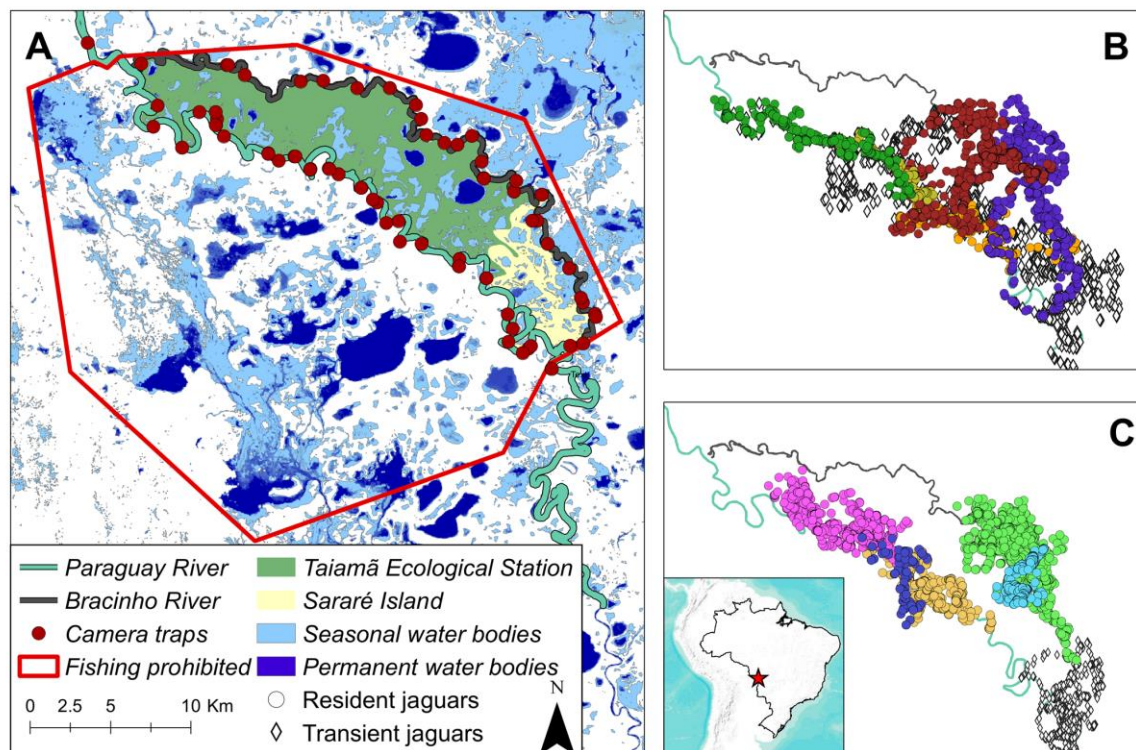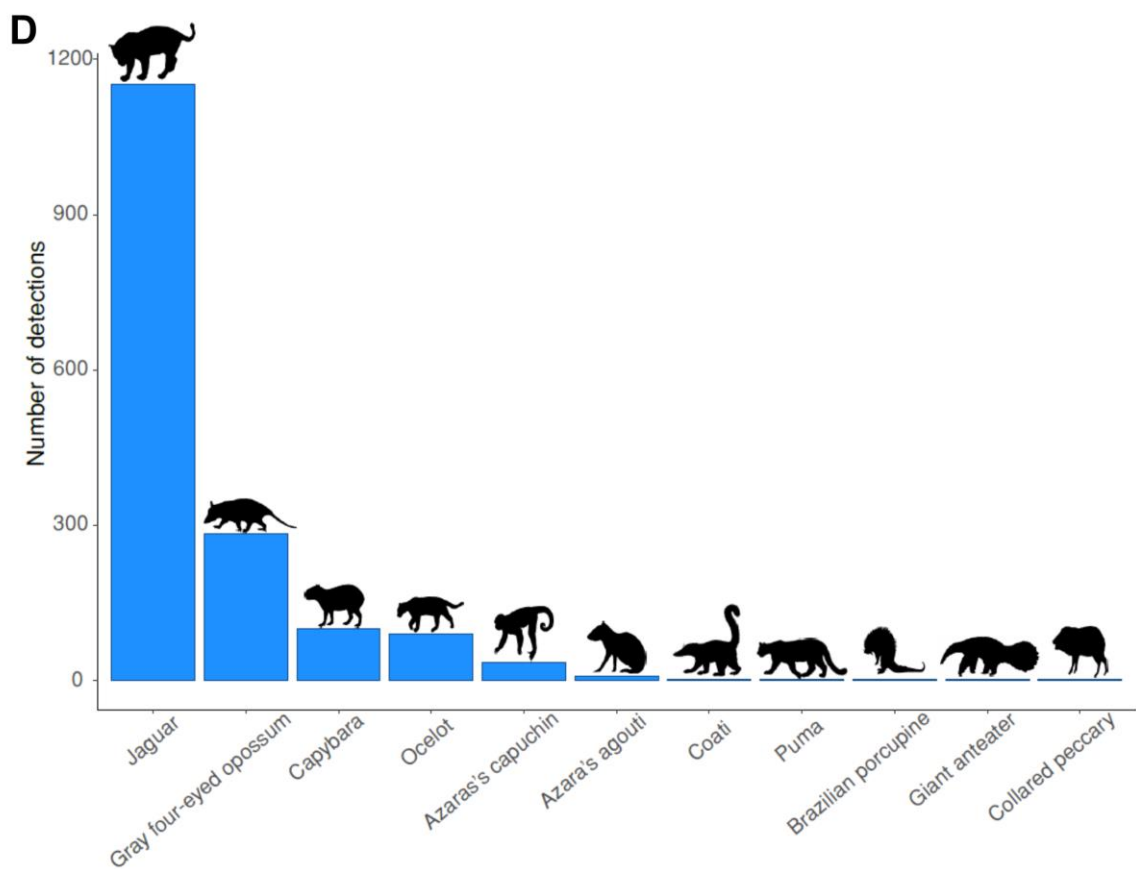

387 Figure 2

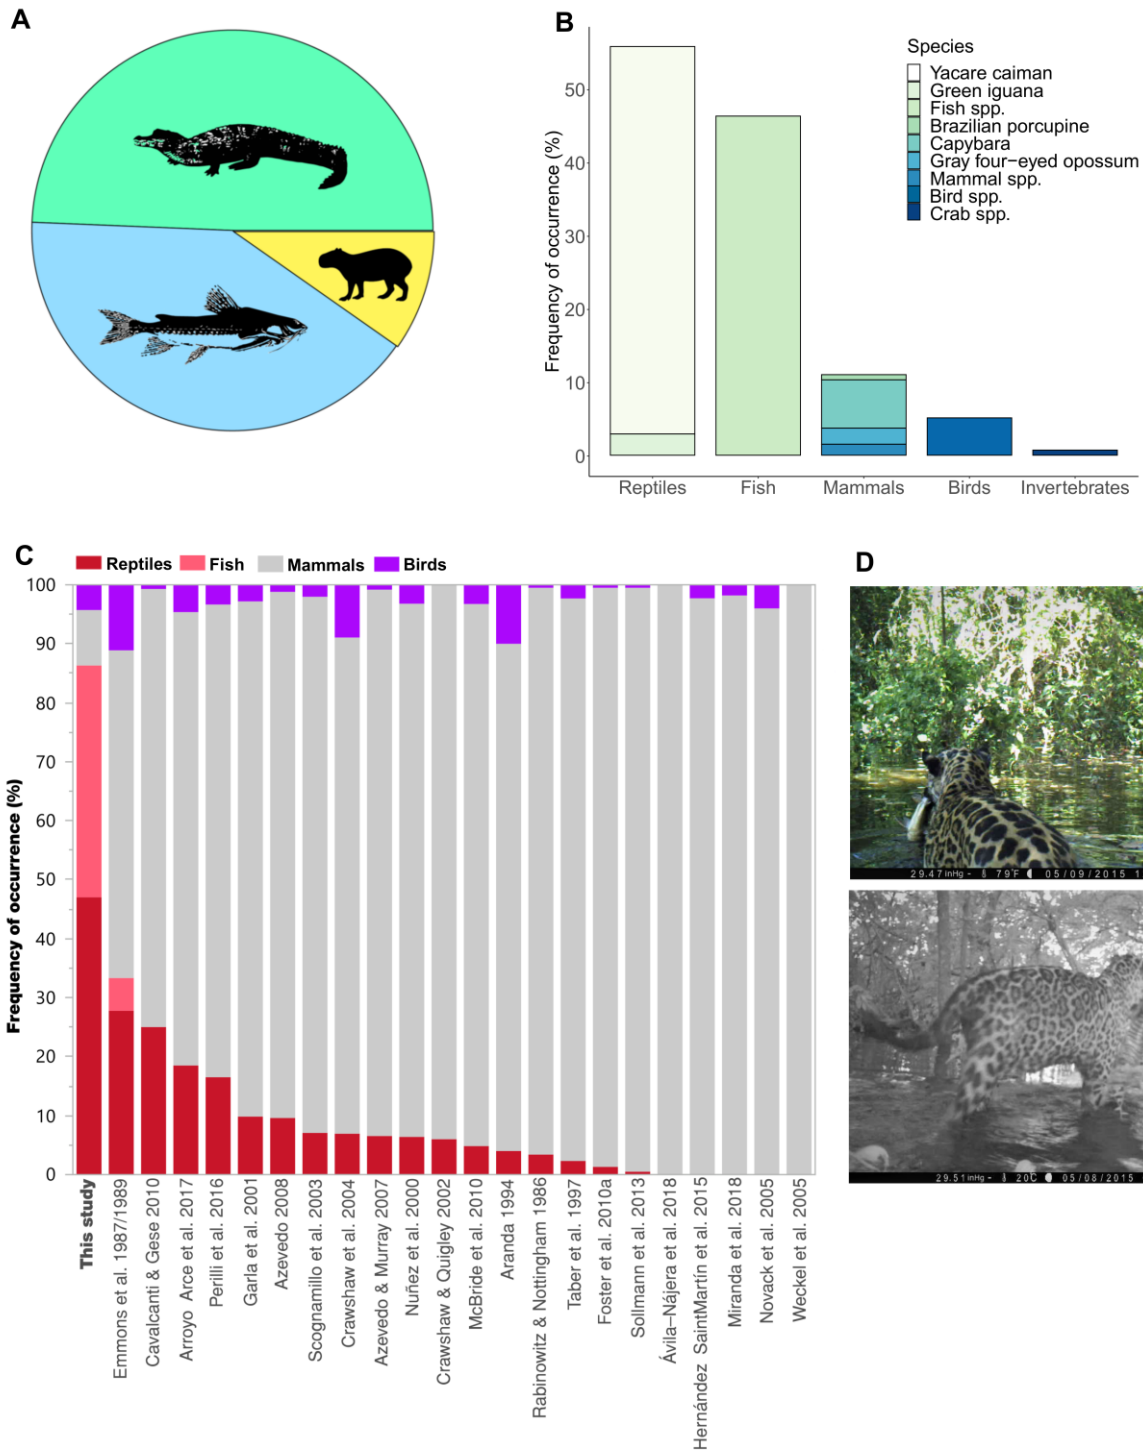

388

389

390

391 Figure 3

**A**

| Type of interaction | Number of camera interactions | Number of GPS interactions | Photo   |
|---------------------|-------------------------------|----------------------------|---------|
| Female + male       | 33                            | 35                         | B, C    |
| Male + male         | 6                             | 5                          | D, E, F |
| Female + female     | 1                             | 0                          | G       |

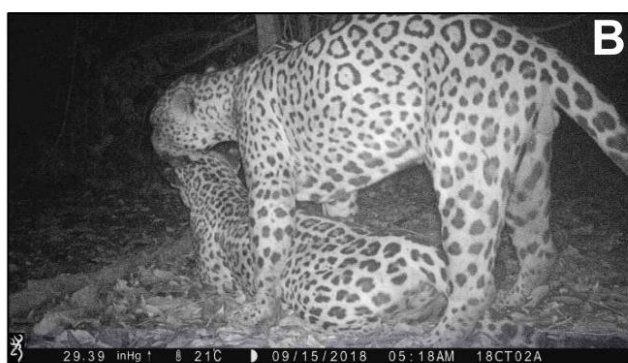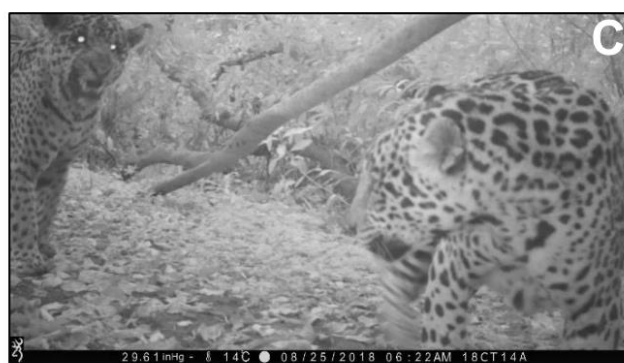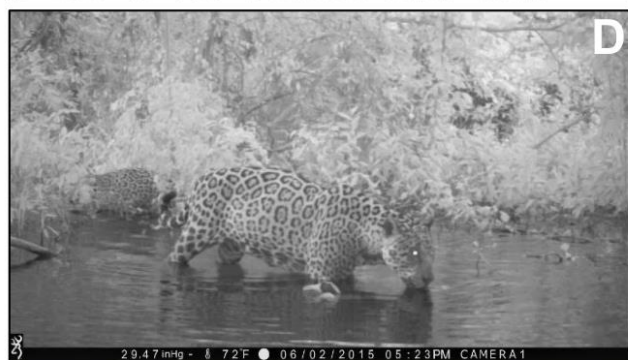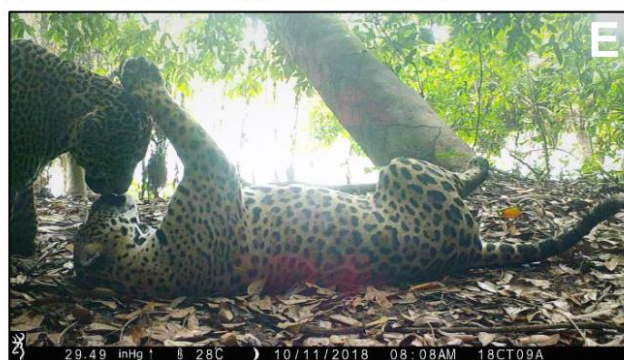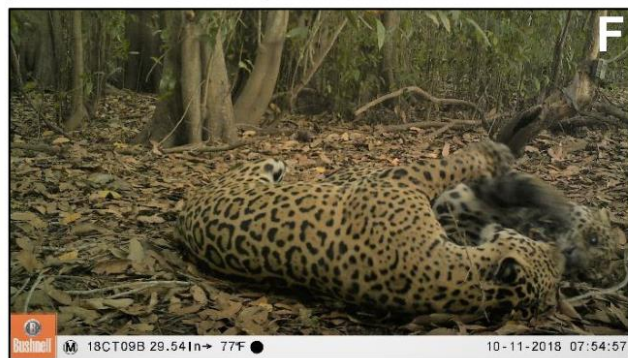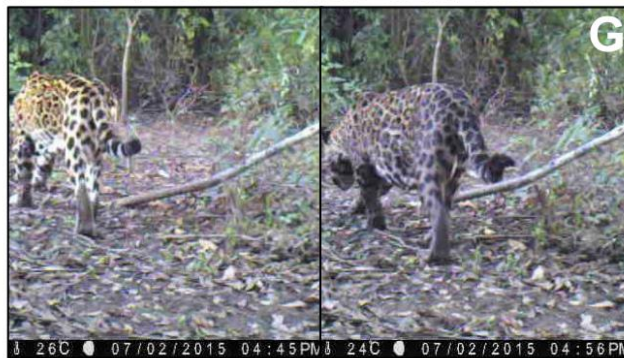

392

393
